# Supplementary material
Source: PubMed Central journal article supplement (PMC2966097)
Supplement: supp_M110.148221_Binder3.pdf [file supp_M110.148221_Binder3.pdf]

## SUPPLEMENTARY MATERIAL

### FUNCTIONAL DIFFERENCES OF INVARIANT AND HIGHLY CONSERVED RESIDUES IN THE EXTRACELLULAR DOMAIN OF THE GLYCOPROTEIN HORMONE RECEPTORS

Krassimira Angelova, Hugo de Jonge, Joke C.M. Granneman, David Puett, and Jan Bogerd

The material presented in this Supplement refer to: (a) structural information on the FSH-FSHR ECD complex (1), (b) our results from molecular modeling of LH, TSH and the complexes of CG and TSH with the LHR ECD and TSHR ECD, respectively.

#### RESULTS

*Information on the structure of the FSH-FSHR ECD complex-* The interactions of the six amino acid residues of FSHR shown to be in contact with the FSH  $\alpha$ -subunit (1) are given in Supplemental Table 1. These six residues interact with seven sites on the hormone. Panels A-C of Supplemental Fig. 1 show the structures of  $\beta$ -strands 2, 4 and 5, and the detailed interactions of FSHR K<sup>74</sup>, Y<sup>124</sup>, N<sup>129</sup>, D<sup>150</sup> and D<sup>153</sup> with the  $\alpha$ -subunit are presented in panel D.

**Supplemental Figure 1. Schematic representations of the FSHR ECD residues studied.** Residues that comprise  $\beta$ -strands 2 (A), 4 (B) and 5 (C), respectively, of the FSHR ECD (1) are shown. Interacting residues are protruding from the concave side of the ECD (pointing to the right) while hydrophobic residues point inwards (to the left) and form the hydrophobic core typical for a LRR domain. A schematic LIGPLOT (2) presentation of the interactions between the FSH  $\alpha$ -subunit ( $\alpha$ ) and the FSHR ECD (R) relevant for this study is shown in D.

#### References

1. Fan QR, Hendrickson WA (2005) *Nature* **433**, 269-277
2. Reynolds C, Damerell D, Jones S (2009) *Bioinformatics* **25**, 413-414
3. Laskowski RA (1995) *J. Mol. Graph.* **323-330**, 307-308
4. DeLano WL (2002) The PyMOL Molecular Graphics System. DeLano Scientific, Palo Alto, CA, USA (<http://www.pymol.org>)
5. Sippl MJ, Wiederstein M (2008) *Bioinformatics* **24**, 426-427

**Supplemental Table 1. Interactions between FSHR ECD and FSH  $\alpha$ -subunit.**

| <b>Hydrogen bonds and salt bridges</b>      |                                                      |                       |              |                                    |
|---------------------------------------------|------------------------------------------------------|-----------------------|--------------|------------------------------------|
| FSHR ECD                                    |                                                      | FSH $\alpha$ -subunit |              | Distance (Å)                       |
| K <sup>74</sup>                             | N $\zeta$                                            | S <sup>85</sup>       | O $\gamma$   | 3.4 <sup>1</sup> /3.1 <sup>2</sup> |
|                                             | N $\zeta$                                            | T <sup>86</sup>       | O $\gamma$ 1 | 3.2 <sup>1</sup> /3.4 <sup>2</sup> |
| N <sup>129</sup>                            | O $\delta$ 1                                         | L <sup>48</sup>       | N            | 3.3 <sup>1</sup> /3.2 <sup>2</sup> |
|                                             | O $\delta$ 1                                         | V <sup>49</sup>       | N            | 3.1 <sup>1</sup> /3.0 <sup>2</sup> |
| D <sup>150</sup>                            | O $\delta$ 2                                         | K <sup>91</sup>       | N $\zeta$    | 3.1 <sup>1</sup> /2.8 <sup>2</sup> |
| D <sup>153</sup>                            | O $\delta$ 2 <sup>1</sup> /O $\delta$ 2 <sup>2</sup> | K <sup>51</sup>       | N $\zeta$    | 3.4 <sup>1</sup> /3.2 <sup>2</sup> |
|                                             | O $\delta$ 1 <sup>2</sup>                            | K <sup>51</sup>       | N $\zeta$    | 3.2 <sup>2</sup>                   |
| <b>Hydrophobic (carbon-carbon) contacts</b> |                                                      |                       |              |                                    |
| Y <sup>124</sup>                            |                                                      | Y <sup>88</sup>       |              | $\leq 4.0$ <sup>1,2</sup>          |
| T <sup>130</sup>                            |                                                      | L <sup>48</sup>       |              | $\leq 4.0$ <sup>1,2</sup>          |
| D <sup>153</sup>                            |                                                      | V <sup>49</sup>       |              | $\leq 4.0$ <sup>1,2</sup>          |
| <b>No interactions</b>                      |                                                      |                       |              |                                    |
| S <sup>78</sup>                             |                                                      |                       |              |                                    |
| D <sup>224</sup>                            |                                                      |                       |              |                                    |
| S <sup>226</sup>                            |                                                      |                       |              |                                    |

<sup>1,2</sup>Distances are given between the FSHR ECD and FSH  $\alpha$ -subunit residues indicated, for each of the two slightly different hormone-receptor complexes (1).

**Supplemental Table 2. PROTORP output of hormone-receptor interfaces in the three complexes**

|                                                     | FSH-FSHR <sup>1</sup> |             |         | FSH-FSHR <sup>2</sup> |             |         | CG-LHR      |            |         | TSH-TSHR     |             |         |
|-----------------------------------------------------|-----------------------|-------------|---------|-----------------------|-------------|---------|-------------|------------|---------|--------------|-------------|---------|
|                                                     | FSH $\alpha$          | FSH $\beta$ | ECD     | FSH $\alpha$          | FSH $\beta$ | ECD     | CG $\alpha$ | CG $\beta$ | ECD     | TSH $\alpha$ | TSH $\beta$ | ECD     |
| Interface accessible surface area (Å <sup>2</sup> ) | 817.68                | 617.40      | 744.03  | 859.69                | 605.67      | 786.86  | 813.37      | 514.28     | 777.11  | 757.65       | 575.23      | 672.40  |
| % Interface accessible surface area                 | 10.96                 | 7.61        | 6.52    | 12.27                 | 7.20        | 7.29    | 11.80       | 6.49       | 6.86    | 10.27        | 6.86        | 5.72    |
| Atoms in interface                                  | 59                    | 49          | 75      | 63                    | 45          | 83      | 64          | 42         | 80      | 64           | 49          | 74      |
| % Polar atoms contribution to interface             | 35.87                 | 34.67       | 43.92   | 33.87                 | 36.71       | 42.38   | 34.54       | 44.46      | 47.50   | 33.73        | 42.96       | 32.32   |
| % Non-polar atoms contribution to interface         | 45.84                 | 48.09       | 28.94   | 46.92                 | 55.99       | 28.96   | 47.58       | 27.72      | 23.65   | 51.08        | 48.47       | 37.38   |
| % Neutral atoms contribution to interface           | 17.70                 | 16.61       | 25.87   | 18.74                 | 6.55        | 27.90   | 17.34       | 26.89      | 27.54   | 15.03        | 7.95        | 28.80   |
| Residues in interface                               | 17                    | 17          | 27      | 17                    | 15          | 28      | 16          | 16         | 27      | 19           | 17          | 24      |
| % Polar residues in interface                       | 52.94                 | 29.41       | 44.44   | 58.82                 | 26.67       | 39.29   | 50.00       | 18.75      | 44.44   | 57.89        | 29.41       | 37.50   |
| % Non-polar residues in interface                   | 17.65                 | 35.29       | 22.22   | 17.65                 | 40.00       | 21.43   | 18.75       | 43.75      | 14.81   | 15.79        | 41.18       | 29.17   |
| % Charged residues in interface                     | 29.41                 | 35.29       | 33.33   | 23.53                 | 33.33       | 39.29   | 31.25       | 37.50      | 40.74   | 26.32        | 29.41       | 33.33   |
| Residues on surface                                 | 259                   | 275         | 259     | 245                   | 269         | 245     | 255         | 275        | 255     | 269          | 287         | 269     |
| % Polar residues on surface                         | 42.47                 | 42.18       | 42.47   | 43.27                 | 41.64       | 43.27   | 41.57       | 37.45      | 41.57   | 43.49        | 42.86       | 43.49   |
| % Non-polar residues on surface                     | 31.66                 | 30.18       | 31.66   | 31.84                 | 31.23       | 31.84   | 35.29       | 39.64      | 35.29   | 35.32        | 35.54       | 35.32   |
| % Charged residues on surface                       | 25.87                 | 27.64       | 25.87   | 24.90                 | 27.14       | 24.90   | 23.14       | 22.91      | 23.14   | 21.19        | 21.60       | 21.19   |
| Planarity (Å)                                       | 2799                  | 1519        | 2930    | 2622                  | 1971        | 3002    | 2929        | 1826       | 3130    | 2945         | 2180        | 2779    |
| Eccentricity                                        | 0.898                 | 0.935       | 0.774   | 0.876                 | 0.920       | 0.720   | 0.891       | 0.949      | 0.807   | 0.871        | 0.952       | 0.745   |
| Secondary structure in interface                    | Coil                  | Beta        | Beta    | Beta                  | Beta        | Beta    | Beta        | Beta       | Beta    | Beta         | Beta        | Beta    |
| % Alpha character in interface                      | 5.88                  | 11.76       | 0.00    | 0.00                  | 0.00        | 0.00    | 0.00        | 0.00       | 0.00    | 5.26         | 17.65       | 0.00    |
| % Beta character in interface                       | 17.65                 | 47.06       | 51.85   | 29.41                 | 53.33       | 35.71   | 37.50       | 56.25      | 40.74   | 26.32        | 41.18       | 37.50   |
| Secondary structure on surface                      | Beta                  | Beta        | Beta    | Beta                  | Beta        | Beta    | Beta        | Beta       | Beta    | Beta         | Beta        | Beta    |
| % Alpha character on surface                        | 2.70                  | 2.55        | 2.70    | 0.00                  | 0.00        | 0.00    | 2.75        | 2.91       | 2.75    | 2.97         | 2.79        | 2.97    |
| % Beta character on surface                         | 49.81                 | 50.91       | 49.81   | 51.02                 | 49.81       | 51.02   | 50.59       | 50.91      | 50.59   | 49.44        | 50.17       | 49.44   |
| Hydrogen bonds                                      | 7                     | 3           | 7       | 13                    | 5           | 13      | 6           | 0          | 6       | 2            | 2           | 2       |
| Salt bridges                                        | 31                    | 29          | 20      | 38                    | 27          | 29      | 32          | 18         | 16      | 20           | 21          | 11      |
| Gap volume (Å <sup>3</sup> )                        | 7475.62               | 8012.25     | 7475.62 | 8096.62               | 7809.75     | 8096.62 | 8575.88     | 7519.50    | 8575.88 | 8211.38      | 8265.38     | 8211.38 |
| Gap volume index (Å)                                | 4.57                  | 6.49        | 5.02    | 4.71                  | 6.45        | 5.14    | 5.27        | 7.31       | 5.52    | 5.42         | 7.18        | 6.11    |

PROTORP (2) (<http://www.bioinformatics.sussex.ac.uk/protorp/params.html>) calculates the properties for one subunit-subunit interaction at the time and the table therefore lists the interface of the  $\alpha$ -subunit with the ECD, the interface of the  $\beta$ -subunit with the ECD, and the ECD interface with the  $\alpha$ -subunit. The accessible surface area (ASA) is calculated using the NACCESS algorithm. Residues that loose  $\geq 1.0$  Å<sup>2</sup> of ASA upon complex formation are defined as being part of the interaction site. The terms used to define the shape of the interaction site as well as the gap volume are calculated using the SURFNET package (3). The gap volume is often used to indicate the complementarity and closeness of the two interacting surfaces. The indices 1 and 2 indicate the two slightly different FSH - FSHR complexes found in the PDB deposited by Fan and Hendrickson (1).

**Supplemental Table 3. Qualitative comparison between experimental and modeled structures. RMSD values after C- $\alpha$  superposition, percentage sequence alignment for superpositioned structures and Ramachandran values.**

| GpHs              | Root-mean-square error of superposition in Angstrom of all              |                  |                   |                   |           |            |           |           |
|-------------------|-------------------------------------------------------------------------|------------------|-------------------|-------------------|-----------|------------|-----------|-----------|
|                   | Equivalent C- $\alpha$ atoms (relative cover of query vs target length) |                  |                   |                   |           |            |           |           |
|                   | FSH <sup>1</sup>                                                        | FSH <sup>2</sup> | 1FL7 <sup>1</sup> | 1FL7 <sup>2</sup> | 1HCN      | LH         | TSH       | CG        |
| FSH <sup>1</sup>  | x                                                                       | 0.7 (99%)        | 1.0 (95%)         | 1.6 (95%)         | 1.5 (88%) | 0.4 (100%) | 0.3 (99%) | 0.7 (98%) |
| FSH <sup>2</sup>  |                                                                         | x                | 1.0 (96%)         | 1.5 (97%)         | 1.6 (89%) | 0.7 (98%)  | 0.7 (98%) | 0.8 (96%) |
| 1FL7 <sup>1</sup> |                                                                         |                  | x                 | 1.2 (97%)         | 1.7 (89%) | 1.2 (97%)  | 1.0 (96%) | 0.8 (93%) |
| 1FL7 <sup>2</sup> |                                                                         |                  |                   | x                 | 1.6 (88%) | 1.7 (97%)  | 1.6 (95%) | 1.3 (93%) |
| 1HCN              |                                                                         |                  |                   |                   | x         | 1.5 (88%)  | 1.6 (89%) | 1.8 (88%) |
| LH                |                                                                         |                  |                   |                   |           | x          | 0.4 (97%) | 0.7 (98%) |
| TSH               |                                                                         |                  |                   |                   |           |            | x         | 0.6 (98%) |
| CG                |                                                                         |                  |                   |                   |           |            |           | x         |

| GpHs              | Sequence identity of query and target in aligned regions in percentage |                  |                   |                   |      |    |     |     |
|-------------------|------------------------------------------------------------------------|------------------|-------------------|-------------------|------|----|-----|-----|
|                   | FSH <sup>1</sup>                                                       | FSH <sup>2</sup> | 1FL7 <sup>1</sup> | 1FL7 <sup>2</sup> | 1HCN | LH | TSH | CG  |
| FSH <sup>1</sup>  | x                                                                      | 100              | 99                | 99                | 69   | 67 | 70  | 68  |
| FSH <sup>2</sup>  |                                                                        | x                | 99                | 99                | 69   | 66 | 70  | 69  |
| 1FL7 <sup>1</sup> |                                                                        |                  | x                 | 100               | 69   | 65 | 69  | 67  |
| 1FL7 <sup>2</sup> |                                                                        |                  |                   | x                 | 68   | 65 | 69  | 67  |
| 1HCN              |                                                                        |                  |                   |                   | x    | 94 | 71  | 100 |
| LH                |                                                                        |                  |                   |                   |      | x  | 69  | 92  |
| TSH               |                                                                        |                  |                   |                   |      |    | x   | 69  |
| CG                |                                                                        |                  |                   |                   |      |    |     | x   |

| ECDs              | 1XWD <sup>1</sup> | 1XWD <sup>2</sup> | LHR       | 3G04      |
|-------------------|-------------------|-------------------|-----------|-----------|
| 1XWD <sup>1</sup> | x                 | 0.7 (95%)         | 0.4 (98%) | 1.1 (91%) |
| 1XWD <sup>2</sup> |                   | x                 | 0.5 (91%) | 1.2 (95%) |
| LHR               |                   |                   | x         | 1.1 (93%) |
| 3G04              |                   |                   |           | x         |

| ECDs              | 1XWD <sup>1</sup> | 1XWD <sup>2</sup> | LHR | 3G04 |
|-------------------|-------------------|-------------------|-----|------|
| 1XWD <sup>1</sup> | x                 | 100               | 47  | 40   |
| 1XWD <sup>2</sup> |                   | x                 | 47  | 40   |
| LHR               |                   |                   | x   | 46   |
| 3G04              |                   |                   |     | x    |

| Residues in Ramachandran regions |          |         |          |
|----------------------------------|----------|---------|----------|
| ID                               | favoured | allowed | outliers |
| FSH <sup>1</sup>                 | 177      | 12      | 2        |
| FSH <sup>2</sup>                 | 179      | 8       | 1        |
| 1FL7 <sup>1</sup>                | 156      | 20      | 12       |
| 1FL7 <sup>2</sup>                | 173      | 10      | 7        |
| 1HCN                             | 177      | 7       | 7        |
| LH                               | 184      | 7       | 4        |
| TSH                              | 182      | 7       | 2        |
| CG                               | 169      | 10      | 7        |
| 1XWD <sup>1</sup>                | 215      | 21      | 4        |
| 1XWD <sup>2</sup>                | 207      | 23      | 1        |
| LHR                              | 215      | 12      | 5        |
| 3G04                             | 212      | 11      | 4        |

| % Occupancy of Ramachandran regions |          |         |          |
|-------------------------------------|----------|---------|----------|
| ID                                  | favoured | allowed | outliers |
| FSH <sup>1</sup>                    | 92.7     | 6.3     | 1.0      |
| FSH <sup>2</sup>                    | 95.2     | 4.3     | 0.5      |
| 1FL7 <sup>1</sup>                   | 83.0     | 10.6    | 6.4      |
| 1FL7 <sup>2</sup>                   | 91.1     | 5.3     | 3.7      |
| 1HCN                                | 92.7     | 3.7     | 3.7      |
| LH                                  | 94.4     | 3.6     | 2.1      |
| TSH                                 | 95.3     | 3.7     | 1.0      |
| CG                                  | 90.9     | 5.4     | 3.8      |
| 1XWD <sup>1</sup>                   | 89.6     | 8.8     | 1.7      |
| 1XWD <sup>2</sup>                   | 89.6     | 10.0    | 0.4      |
| LHR                                 | 92.7     | 5.2     | 2.2      |
| 3G04                                | 93.4     | 4.8     | 1.8      |

The initial superposition was done using PyMol (4) but in order to get the numbers of the C- $\alpha$  superposition we used the web-based server TopMatch (5). Both programs agreed on the RMSD values. Ramachandran plots were generated using RAMPAGE (<http://mordred.bioc.cam.ac.uk/~rapper/rampage.php>). See Table 9 (main text) for additional information.

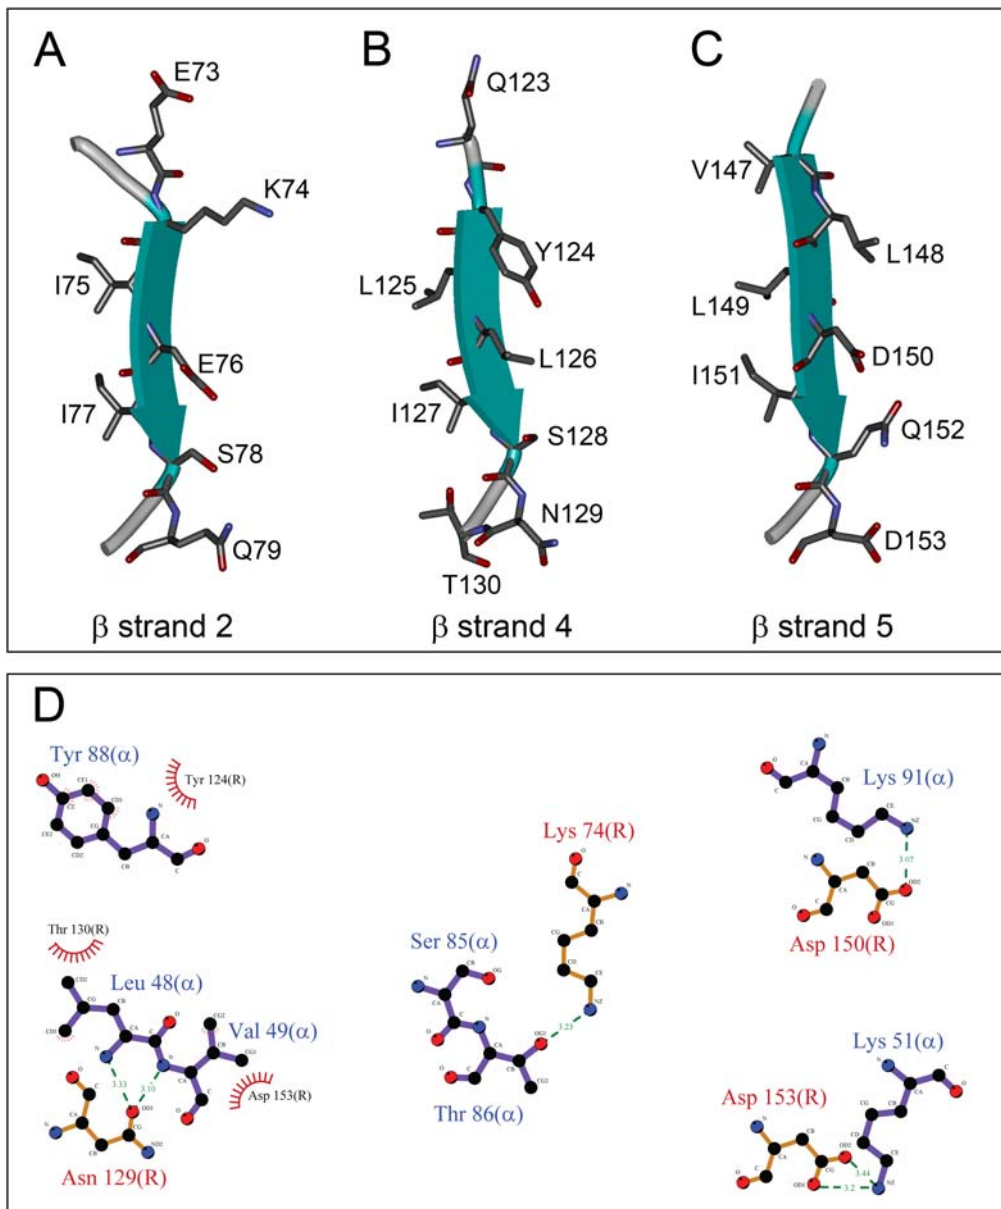

Supplemental Figure 1
